# Supplementary material
Source: publisher figshare collection journal article supplement (https://asha.figshare.com/articles/dataset/_/9630590)
Supplement: Supplementary file 1 [file 1]

**Supplemental Material S2.** Frequency and percentage of each error type and number and percentage of children who produced each error type by language status and age.

|                       | Children with typical language |           |                    |               | Children with language impairment |           |                    |               |
|-----------------------|--------------------------------|-----------|--------------------|---------------|-----------------------------------|-----------|--------------------|---------------|
|                       | Frequency of errors            | Errors/CU | Number of children | % of children | Frequency of errors               | Errors/CU | Number of children | % of children |
| <i>Four-Year-Olds</i> |                                |           |                    |               |                                   |           |                    |               |
| Tense marker          | 313                            | 0.09      | 47                 | 94%           | 212                               | 0.34      | 12                 | 100%          |
| Grammatical morpheme  | 181                            | 0.05      | 48                 | 96%           | 91                                | 0.15      | 11                 | 92%           |
| Argument structure    | 53                             | 0.02      | 26                 | 52%           | 115                               | 0.19      | 12                 | 100%          |
| Pronoun               | 82                             | 0.02      | 22                 | 44%           | 38                                | 0.06      | 7                  | 58%           |
| Other                 | 104                            | 0.03      | 40                 | 80%           | 63                                | 0.10      | 10                 | 83%           |
| Total                 | 733                            | 0.22      | --                 | --            | 519                               | 0.83      | --                 | --            |
| <i>Five-Year-Olds</i> |                                |           |                    |               |                                   |           |                    |               |
| Tense marker          | 247                            | 0.07      | 47                 | 94%           | 253                               | 0.28      | 14                 | 100%          |
| Grammatical morpheme  | 146                            | 0.04      | 38                 | 76%           | 77                                | 0.08      | 13                 | 93%           |
| Argument structure    | 83                             | 0.02      | 16                 | 32%           | 59                                | 0.07      | 12                 | 86%           |
| Pronoun               | 26                             | 0.01      | 14                 | 28%           | 22                                | 0.02      | 9                  | 64%           |
| Other                 | 91                             | 0.03      | 35                 | 70%           | 58                                | 0.06      | 13                 | 93%           |
| Total                 | 593                            | 0.17      | --                 | --            | 469                               | 0.52      | --                 | --            |
| <i>Six-Year-Olds</i>  |                                |           |                    |               |                                   |           |                    |               |
| Tense marker          | 152                            | 0.04      | 41                 | 82%           | 181                               | 0.23      | 11                 | 100%          |
| Grammatical morpheme  | 75                             | 0.02      | 38                 | 76%           | 74                                | 0.09      | 11                 | 100%          |
| Argument structure    | 35                             | 0.01      | 20                 | 40%           | 30                                | 0.04      | 9                  | 82%           |
| Pronoun               | 9                              | < 0.01    | 7                  | 14%           | 33                                | 0.04      | 6                  | 55%           |
| Other                 | 77                             | 0.02      | 37                 | 74%           | 51                                | 0.07      | 10                 | 91%           |
| Total                 | 348                            | 0.10      | --                 | --            | 369                               | --        | --                 | --            |

**Supplemental Material S2. (continued)**

|                        | Children with typical language |           |                       |                  | Children with language impairment |           |                       |                  |
|------------------------|--------------------------------|-----------|-----------------------|------------------|-----------------------------------|-----------|-----------------------|------------------|
|                        | Frequency<br>of errors         | Errors/CU | Number of<br>children | % of<br>children | Frequency<br>of errors            | Errors/CU | Number of<br>children | % of<br>children |
| <i>Seven-Year-Olds</i> |                                |           |                       |                  |                                   |           |                       |                  |
| Tense marker           | 102                            | 0.03      | 36                    | 72%              | 146                               | 0.15      | 12                    | 92%              |
| Grammatical morpheme   | 95                             | 0.03      | 40                    | 80%              | 76                                | 0.08      | 13                    | 100%             |
| Argument structure     | 16                             | < 0.01    | 11                    | 22%              | 33                                | 0.03      | 9                     | 69%              |
| Pronoun                | 19                             | 0.01      | 11                    | 22%              | 22                                | 0.02      | 8                     | 62%              |
| Other                  | 71                             | 0.02      | 13                    | 26%              | 61                                | 0.06      | 13                    | 100%             |
| Total                  | 303                            | 0.08      | --                    | --               | 338                               | 0.34      | --                    | --               |
| <i>Eight-Year-Olds</i> |                                |           |                       |                  |                                   |           |                       |                  |
| Tense marker           | 73                             | 0.02      | 32                    | 64%              | 159                               | 0.13      | 16                    | 94%              |
| Grammatical morpheme   | 52                             | 0.01      | 28                    | 56%              | 55                                | 0.04      | 16                    | 94%              |
| Argument structure     | 14                             | < 0.01    | 12                    | 24%              | 17                                | 0.01      | 10                    | 59%              |
| Pronoun                | 10                             | < 0.01    | 9                     | 18%              | 16                                | 0.01      | 9                     | 53%              |
| Other                  | 62                             | 0.02      | 25                    | 50%              | 46                                | 0.04      | 16                    | 94%              |
| Total                  | 211                            | 0.05      | --                    | --               | 293                               | 0.24      | --                    | --               |
| <i>Nine-Year-Olds</i>  |                                |           |                       |                  |                                   |           |                       |                  |
| Tense marker           | 77                             | 0.02      | 33                    | 66%              | 77                                | 0.10      | 9                     | 90%              |
| Grammatical morpheme   | 75                             | 0.02      | 32                    | 64%              | 23                                | 0.03      | 9                     | 90%              |
| Argument structure     | 16                             | < 0.01    | 14                    | 28%              | 7                                 | 0.01      | 6                     | 60%              |
| Pronoun                | 17                             | < 0.01    | 10                    | 20%              | 16                                | 0.02      | 4                     | 40%              |
| Other                  | 86                             | 0.02      | 35                    | 70%              | 26                                | 0.03      | 10                    | 100%             |
| Total                  | 271                            | 0.07      | --                    | --               | 149                               | 0.19      | --                    | --               |

*Note.* “Grammatical morpheme” refers to omission or incorrect uses of grammatical morphemes other than pronominal forms and tense markers; Errors/CU = errors per C-unit (that was included for the percent grammatical utterances [PGU] analysis).
