# Supplementary material
Source: publisher figshare collection journal article supplement (https://asha.figshare.com/articles/dataset/_/9630590)
Supplement: Supplementary file 2 [file 1]

**Supplemental Material S5.** Indices of diagnostic accuracy for percent grammatical utterances (PGU) using prescriptive cutoff scores.

The tables below present the diagnostic accuracy for PGU using  $-1 SD$ ,  $-1.25 SD$ ,  $-1.5 SD$ , or  $-2 SD$  as the cutoff scores.

**Table 5.1.** Indices of diagnostic accuracy for PGU by age using  $-1 SD$  as the cutoff score.

| Age Level   | Cut-off<br>( $-1 SD$ ) | Sensitivity   | Specificity   | Overall<br>Accuracy | LR+     | LR-    |
|-------------|------------------------|---------------|---------------|---------------------|---------|--------|
| 4-Year-Olds | 63.95%                 | 83%* (10/12)  | 90%** (45/50) | 88% (55/62)         | 8.33*   | 0.19*  |
| 5-Year-Olds | 68.78%                 | 86%* (12/14)  | 92%** (46/50) | 91% (58/64)         | 10.71** | 0.16*  |
| 6-Year-Olds | 84.04%                 | 82%* (9/11)   | 90%** (45/50) | 89% (54/61)         | 8.18*   | 0.20*  |
| 7-Year-Olds | 85.97%                 | 92%** (12/13) | 88%* (44/50)  | 87% (56/63)         | 7.69*   | 0.09** |
| 8-Year-Olds | 91.46%                 | 88%* (15/17)  | 84%* (42/50)  | 85% (57/67)         | 5.51*   | 0.14*  |
| 9-Year-Olds | 89.55%                 | 90%** (9/10)  | 84%* (42/50)  | 85% (51/60)         | 5.63*   | 0.12*  |

Note:  $-1 SD$  = mean - 1 standard deviation (e.g., at age 4,  $78.82\% - 1 \times 14.87\% = 63.95\%$ ).

**Table 5.2.** Indices of diagnostic accuracy for PGU by age using  $-1.25 SD$  as the cutoff score.

| Age Level   | Cut-off<br>( $-1.25 SD$ ) | Sensitivity  | Specificity   | Overall<br>Accuracy | LR+     | LR-   |
|-------------|---------------------------|--------------|---------------|---------------------|---------|-------|
| 4-Year-Olds | 60.23%                    | 83%* (10/12) | 96%** (48/50) | 94% (58/62)         | 20.83** | 0.17* |
| 5-Year-Olds | 65.02%                    | 71% (10/14)  | 92%** (46/50) | 88% (56/64)         | 8.92*   | 0.31  |
| 6-Year-Olds | 82.39%                    | 73% (8/11)   | 90%** (45/50) | 87% (53/61)         | 7.27*   | 0.30  |
| 7-Year-Olds | 84.50%                    | 85%* (11/13) | 88%* (44/50)  | 87% (56/63)         | 7.05*   | 0.17* |
| 8-Year-Olds | 90.59%                    | 76% (13/17)  | 90%** (45/50) | 87% (58/67)         | 7.64*   | 0.26  |
| 9-Year-Olds | 88.49%                    | 90%** (9/10) | 88%* (44/50)  | 88% (53/60)         | 7.50*   | 0.11* |

Note:  $-1.25 SD$  = mean - 1.25 standard deviations (e.g., at age 4,  $78.82\% - 1.25 \times 14.87\% = 60.23\%$ ).

**Table 5.3.** Indices of diagnostic accuracy for PGU by age using -1.5 *SD* as the cutoff score.

| Age Level   | Cut-off<br>(-1.5 <i>SD</i> ) | Sensitivity  | Specificity   | Overall<br>Accuracy | LR+     | LR-   |
|-------------|------------------------------|--------------|---------------|---------------------|---------|-------|
| 4-Year-Olds | 56.52%                       | 83%* (10/12) | 96%** (48/50) | 94% (58/62)         | 20.83** | 0.17* |
| 5-Year-Olds | 61.27%                       | 57% (8/14)   | 96%** (48/50) | 88% (56/64)         | 14.29** | 0.45  |
| 6-Year-Olds | 80.74%                       | 73% (8/11)   | 94%** (47/50) | 90% (55/61)         | 12.12** | 0.29  |
| 7-Year-Olds | 83.03%                       | 85%* (11/13) | 88%* (44/50)  | 87% (55/63)         | 8.46*   | 0.17* |
| 8-Year-Olds | 89.72%                       | 76% (13/17)  | 92%** (46/50) | 88% (59/67)         | 9.56*   | 0.26  |
| 9-Year-Olds | 87.43%                       | 60%** (6/10) | 92%* (46/50)  | 87% (52/60)         | 7.50*   | 0.43  |

Note: -1.5 *SD* = mean - 1.5 standard deviations (e.g., at age 4, 78.82% - 1.5\*14.87% = 56.52%).

**Table 5.4.** Indices of diagnostic accuracy for PGU by age using -2 *SD* as the cutoff score.

| Age Level   | Cut-off<br>(-2 <i>SD</i> ) | Sensitivity <sup>b</sup> | Specificity   | Overall<br>Accuracy | LR+ <sup>a</sup> | LR-   |
|-------------|----------------------------|--------------------------|---------------|---------------------|------------------|-------|
| 4-Year-Olds | 49.08%                     | 83%* (10/12)             | 96%** (48/50) | 94% (58/62)         | 20.83**          | 0.17* |
| 5-Year-Olds | 53.75%                     | 36% (5/14)               | 96%** (48/50) | 83% (53/64)         | 8.92*            | 0.67  |
| 6-Year-Olds | 77.44%                     | 64% (7/11)               | 96%** (48/50) | 90% (55/61)         | 15.91**          | 0.38  |
| 7-Year-Olds | 80.08%                     | 69% (9/13)               | 94%** (47/50) | 87% (56/63)         | 11.54**          | 0.33  |
| 8-Year-Olds | 87.98%                     | 76% (13/17)              | 96%** (48/50) | 91% (61/67)         | 19.11**          | 0.26  |
| 9-Year-Olds | 88.49%                     | 90%** (9/10)             | 88%* (44/50)  | 88% (53/60)         | 7.50*            | 0.11* |

Note: -2 *SD* = mean - 2 standard deviations (e.g., at age 4, 78.82% - 2\*14.87% = 49.08%).
