# Supplementary material
Source: publisher figshare collection journal article supplement (https://asha.figshare.com/articles/dataset/_/9630590)
Supplement: Supplementary file 3 [file 1]

## Supplemental Material S1. Computation of PGU.

The sample below demonstrates the computation percent grammatical utterances (PGU). Although we transcribed and coded the data based on the Systematic Analysis of Language Transcripts (SALT) conventions (Miller & Chapman, 2000), we do not apply the SALT conventions here for the ease of interpretation. The statements within the parentheses correspond to our coding for the target morphemes.

In the sample, there are 13 utterances (A, B, D, E, F, G, H, I, J, K, L, M) included for analysis. Utterance C is not included for analysis because it has no verbs. Utterance M, however, is included because utterances with the omission of copula *be* are included for the computation of PGU scores in the present study. Among the 12 C-units included for analysis, four of them (Utterances B, E, F, and I) do not have any errors and are counted as grammatical. Thus, percent grammatical utterances (PGU) of this sample is 33% (4/12).

- A. The dog make a castle. (omission of tense marker)
- B. The rabbit got a shovel. (grammatical)
- C. A sandbox. (excluded for analysis)
- D. him was shovel. (pronoun error; omission of present participle *-ing*)
- E. They were playing. (grammatical)
- F. The dog is not happy because the rabbit poured the sand on the castle. (grammatical)
- G. And is one castle. (omission of subject)
- H. The dog fix it all week. (omission of tense marker)
- I. The dog is sad. (grammatical)
- J. The rabbit said not sorry. (“other” error)
- K. The dog keep doing it. (omission of tense marker).
- L. \*the castle fell apart. (omission of article *the*)
- M. He mad. (omission of tense marker)

## Reference

Miller, J., & Chapman, R. S. (2000). *Systematic Analysis of Language Transcripts* [Computer software]. Madison: University of Wisconsin.
