# Supplementary material
Source: publisher figshare collection journal article supplement (https://asha.figshare.com/articles/dataset/_/9630590)
Supplement: Supplementary file 4 [file 1]

### Supplemental Material S3.

The table below presents the  $F$  values,  $p$  values, and effect sizes ( $d$ ) for the group differences in total number of C-units, mean length of C-units in morphemes (MLCUM), number of different words (NDW), and number of C-units for the percent grammatical utterances (PGU) analysis (# of CU for PGU) by age.

| Age        | Total Number of C-units                        | MLCUM                                           | NDW                                             | # of CU for PGU                                 |
|------------|------------------------------------------------|-------------------------------------------------|-------------------------------------------------|-------------------------------------------------|
| 4-Year-Old | $F(1, 61) = 2.65$<br>$p = 0.109$<br>$d = 0.41$ | $F(1, 61) = 23.88$<br>$p < 0.001$<br>$d = 1.26$ | $F(1, 61) = 17.39$<br>$p < 0.001$<br>$d = 1.08$ | $F(1, 61) = 4.60$<br>$p = 0.036$<br>$d = 0.55$  |
| 5-Year-Old | $F(1, 63) = 0.05$<br>$p = 0.830$<br>$d = 0.06$ | $F(1, 63) = 30.84$<br>$p < 0.001$<br>$d = 1.41$ | $F(1, 63) = 8.88$<br>$p = 0.004$<br>$d = 0.76$  | $F(1, 63) = 0.99$<br>$p = 0.324$<br>$d = 0.26$  |
| 6-Year-Old | $F(1, 60) = 0.08$<br>$p = 0.773$<br>$d = 0.06$ | $F(1, 60) = 2.77$<br>$p = 0.101$<br>$d = 0.43$  | $F(1, 60) = 3.99$<br>$p = 0.050$<br>$d = 0.52$  | $F(1, 60) = 0.01$<br>$p = 0.932$<br>$d < 0.01$  |
| 7-Year-Old | $F(1, 62) = 0.65$<br>$p = 0.423$<br>$d = 0.21$ | $F(1, 62) = 18.98$<br>$p < 0.001$<br>$d = 1.12$ | $F(1, 62) = 3.22$<br>$p = 0.078$<br>$d = 0.46$  | $F(1, 62) = 0.17$<br>$p = 0.679$<br>$d = 0.11$  |
| 8-Year-Old | $F(1, 66) = 0.61$<br>$p = 0.436$<br>$d = 0.19$ | $F(1, 66) = 30.12$<br>$p < 0.001$<br>$d = 1.36$ | $F(1, 66) = 7.35$<br>$p = 0.009$<br>$d = 0.67$  | $F(1, 66) = 1.12$<br>$p = 0.294$<br>$d = 0.26$  |
| 9-Year-Old | $F(1, 59) = 0.15$<br>$p = 0.698$<br>$d = 0.11$ | $F(1, 59) = 8.98$<br>$p = 0.004$<br>$d = 0.79$  | $F(1, 59) = 0.36$<br>$p = 0.553$<br>$d = 0.16$  | $F(1, 59) = 0.051$<br>$p = 0.823$<br>$d = 0.06$ |
